# Supplementary material
Source: publisher site journal article supplement (https://www.dovepress.com/article/332638)
Supplement: Supplementary file 1 [file get_supplementary_file.php]

**Appendix A: Questionnaire Questions Before and After expert panel's recommendations for changes**

| **Original Items** | **Modified Items** |
| --- | --- |
| 1. How much do you know about shared decision making? Please score your knowledge on a scale from 0 (=no knowledge) to 10 (=comprehensive knowledge).  ما هومقدار معرفتك عن مفهوم المشاركة في صنع القرار مع الطبيب المعالج؟  يرجى تسجيل معرفتك باستخدام مقياس من ٠ (ليس لدي معرفة) الى ١٠ (لدي معرفة شاملة)) | 1. How much do you know about shared decision making? Please score your knowledge on a scale from 0 (=no knowledge) to 10 (=comprehensive knowledge).  ما هومقدار معرفتك عن مفهوم المشاركة في صنع القرار مع الطبيب المعالج؟  يرجى تسجيل معرفتك باستخدام مقياس من ٠ (ليس لدي معرفة) الى ١٠ (لدي معرفة شاملة) |
| In your opinion, to how extent do you think the following communicative behaviours are essential for shared decision-making?   (1- not essential at all, 2-moderately not essential, 3-neutral, 4-essential, 5-highly essential).  في رأيك، إلى أي مدى تعتقد أن سلوكيات التواصل التالية ضرورية لصنع القرار المشترك بينك وبين الطبيب المعالج؟ (١- ليس ضروريًا على الإطلاق، ٢ - معتدل غير أساسي، ٣- محايد، ٤- أساسي ، ٥- ضروري للغاية) | In your opinion, to what extent do you think the following communicative behaviours are essential for shared decision-making?  (1- not essential at all, 2-moderately not essential, 3-neutral, 4-essential, 5-highly essential).  في رأيك، إلى أي مدى تعتقد أن سلوكيات التواصل التالية ضرورية لصنع القرار المشترك بينك وبين الطبيب المعالج؟ (١- ليس ضروريًا على الإطلاق، ٢ - معتدل غير أساسي، ٣- محايد، ٤- أساسي ، ٥- ضروري للغاية) |
| 2.  The doctor should explain to me that there is more than one treatment option.  على الطبيب أن يشرح لي أن هناك أكثر من خيار علاجي | 2. The doctor should explain to me that there is more than one treatment option available.  على الطبيب أن يشرح لي أن هناك أكثر من خيار علاجي متاح |
| 3- The doctor should inform me about the possible pros and cons of the treatment options.  يجب أن يخبرني الطبيب عن إيجابيات وسلبيات خيارات العلاج الممكنة | 3- The doctor should inform me about the possible pros and cons of the treatment options.  يجب أن يخبرني الطبيب عن إيجابيات وسلبيات خيارات العلاج الممكنة |
| 4- The doctor should inform me how big the chances of these pros and cons are.  يجب أن يخبرني الطبيب عن حجم فرص هذه الإيجابيات والسلبيات | 4- The doctor should inform me how big the chances of these pros and cons are.  يجب أن يخبرني الطبيب عن حجم فرص نجاح العلاج من حيث الإيجابيات والسلبيات |
| 5- The doctor should explain to me why a certain treatment is chosen.    على الطبيب أن يشرح لي سبب اختيار علاج معين | 5- The doctor should explain to me the reason for choosing a certain treatment.  على الطبيب أن يشرح لي سبب اختيار علاج معين |
| 6- The doctor and I should make a treatment decision together.  يجب أن نتخذ أنا والطبيب قرار العلاج معًا | 6-The doctor and I should agree on a treatment decision together.  يجب أن نتخذ أنا والطبيب قرار العلاج معًا |
| 7- The doctor should explain to me that my opinion is important in making the decision.  على الطبيب أن يشرح لي أن رأيي مهم في اتخاذ القرار | 7- The doctor should explain to me that my opinion is important in making the decision.  على الطبيب أن يشرح لي أن رأيي مهم في اتخاذ القرار |
| 8- The doctor should ask me about my personal values and preferences.  يجب أن يسألني الطبيب عنما افضله في خطة العلاج بناء على قيمي الشخصية | 8- The doctor should discuss with me my personal values, needs and preferences as they relate to the treatment options.  يجب أن يسألني الطبيب عما افضّله في خطة العلاج بناء على قيمي، احتياجاتي، واختياراتي الشخصية |
| 9- The doctor should inform me that a decision needs to be made.  يجب أن يخبرني الطبيب أنه يجب اتخاذ قرار | It has been deleted |
| 10- The doctor should give me information in more ways than only verbally (e.g., leaflets, websites).  يجب أن يعطيني الطبيب المعلومات بطرق أخرى غير الطريقة شفهية (مثل المنشورات والمواقع الإلكترونية) | 9- The doctor should give me information in more ways than only verbally (e.g., leaflets, websites).  يجب أن يعطيني الطبيب المعلومات بطرق أخرى غير الطريقة شفهية (مثل المنشورات والمواقع الإلكترونية) |
| 11 - The doctor should let me decide after giving thorough information.    يجب أن يسمح لي الطبيب باتخاذ القرار بعد تقديم معلومات وافية | 10 - The doctor should let me decide after giving thorough information about my health condition.  يجب أن يسمح لي الطبيب باتخاذ القرار بعد تقديم معلومات وافية عن حالتي الصحية |
| 12- The doctor should let me repeat the given information.  يجب على الطبيب السماح لي بتكرار المعلومات المقدمة | 11- The doctor should ask me to repeat the information to ensure full understanding of the treatment option(s) available.  يجب على الطبيب السماح لي بتكرار المعلومات المقدمة لي بشأن حالتي الصحية |
| 13- The doctor should ask me to bring someone to the consultation, if needed.    يجب أن يطلب مني الطبيب إحضار شخص ما إلى الاستشارة عند الحاجة | 12- The doctor should allow me to be accompanied with a family member to assist me in the decision-making process.  يجب أن يسمح لي الطبيب بمرافقة أحد أفراد الأسرة لمساعدتي في عملية اتخاذ القرار |
| 14- The doctor should allow me time by making the decision in the next consultation, if needed.  على الطبيب أن يمنحني الوقت من خلال اتخاذ القرار في الاستشارة التالية عند الحاجة | 13- I should be allowed enough time to make a decision regarding my health condition.  على الطبيب أن يمنحني الوقت الكافي في اتخاذ القرار الذي يخص حالتي الصحية |
| Thinking about your preferences during last six months consultation with the doctor, to what extent do you agree or disagrees about the following (1 strongly agree- 5 strongly disagrees):    بالتفكير في زياراتك للطبيب خلال الستة أشهر الماضية، إلى أي مدى توافق أو لا توافق على ما يلي (١. أوافق بشدة -- ٥. لا أوافق بشدة): | Thinking about your preferences during the consultations with your doctor in the last Six months, to what extent do you agree or disagrees about the following (1 strongly agree- 5 strongly disagrees):    بالتفكير في زياراتك للطبيب خلال الستة أشهر الماضية، إلى أي مدى توافق أو لا توافق على ما يلي (١. أوافق بشدة -- ٥. لا أوافق بشدة): |
| 15- The important medical decisions should be made by my doctor, not by me.  القرارات الطبية الهامة يجب أن يتخذها الطبيب وليس أنا | 14- The important medical decisions should be made by my doctor, not by me.  القرارات الطبية الهامة يجب أن يتخذها الطبيب وليس أنا |
| 16- I should go along with my doctor’s advice even if I disagree with it.  يجب أن أتماشى مع نصيحة الطبيب، حتى لو كنت لا أوافق عليها | 15- I should go along with my doctor’s advice even if I disagree with it.  يجب أن أتماشى مع نصيحة الطبيب، حتى لو كنت لا أوافق عليها |
| 17- When hospitalized, I should not be involved in making decisions about my own care.   عند دخولي المستشفى، لا يجب أن أتخذ قرارات بشأن رعايتي بنفسي | 16- When hospitalized, I should not be involved in making decisions about my own care.  عند دخولي المستشفى، لا ينبغي أن أشارك في اتخاذ القرارات المتعلقة بحالتي الصحية |
| 18- I should feel free to make decisions about my everyday medical condition.  يجب ان أشعر بالحرية في اتخاذ القرارات بشأن حالتي الصحية | 17- I should feel free to make decisions about my everyday medical condition.  يجب ان أشعر بالحرية في اتخاذ القرارات بشأن حالتي الصحية |
| 19- If I were sick, as my illness became worse, I would want my doctor to take greater control over my medical plan.  إذا كنتُ مريضًا، وأصبح مرضك أسوأ، فقد أرغب في أن يتحكم الطبيب بشكل أكبر حول خطة علاجي | 18- If I were sick, as my illness became worse, I would prefer my doctor to take greater control over my medical plan.  إذا كنتُ مريضًا، وأصبح مرضي أسوأ، فقد أفضل في أن يتحكم الطبيب بشكل أكبر حول خطة علاجي |
| 20- I should decide how frequently I need a check-up.  يجب أن أقرر عدد المرات التي أحتاج فيها لإجراء فحص طبي | 19- I should decide how frequently I need a check-up.  يجب أن أقرر عدد المرات التي أحتاج فيها لإجراء فحص طبي |
| 21- As I become sicker, I should be told more and more about my illness.  عندما أصبح مريضًا، يجب أن يتم إخباري عن مرضي بالتفصيل | 20- As I become sicker, I should be told more and more about my illness.  عندما أصبح مريضًا، يجب أن يتم إخباري عن مرضي بالتفصيل |
| 22- I should understand completely what is happening inside my body as a result of my illness.  يجب أن أفهم تمامًا ما يحدث داخل جسدي نتيجة لمرضي | 21- I should completely understand the status of my health as a result of my illness.  يجب أن أفهم تمامًا ما يحدث داخل جسدي نتيجة لمرضي |
| 23- Even if the news is bad about my illness, I should be well informed about it.  حتى لو كانت الأخبار سيئة عن مرضي، يجب أن أكون على اطلاع جيد بها | 22- I should be well informed about my illness and health condition, no matter how bad the news is.  يجب أن أكون على اطلاع جيد بمرضي وحالتي الصحية، حتى لو كانت الأخبار سيئة عنه |
| 24- My doctor should explain the purpose of my laboratory tests (e.g., x-ray).  يجب أن يشرح الطبيب الغرض من الاختبارات المعملية الخاصة بي (مثلاً فحوصات مخبرية، طلب أشعة). | 23- My doctor should explain to me the purpose of my laboratory tests (e.g., x-ray).  يجب أن يشرح الطبيب الغرض من الاختبارات التشخيصية الخاصة بي (مثلاً فحوصات مخبرية، طلب أشعة) |
| 25- I should be given information only when I ask for it.  يجب أن أحصل على المعلومات فقط عندما أطلبها | 24- I should be given information only when I ask for it.  يجب أن أحصل على المعلومات فقط عندما أطلبها |
| 26- It is important for me to know all the side effects of my medication.  من المهم أن أعرف جميع الآثار الجانبية لدوائي | 25- It is important for me to know all the side effects of my medication.  من المهم أن أعرف جميع الآثار الجانبية لدوائي |
| 27- Information about my illness is as important to me as treatment  المعلومات حول مرضي مهمة بالنسبة لي مثل أهمية المعلومات حول علاجي | 26- Information about my illness is as important to me as my treatment  المعلومات حول مرضي مهمة بالنسبة لي مثل أهمية المعلومات حول علاجي |
| 28- When there is more than one method to treat a health condition, I should be told about each one.  عندما يكون هناك أكثر من طريقة لعلاج حالتي الصحية، يجب إخباري بها كلها | It has been deleted |

**Notes:** Items 2-14 are Adapted by permission from BMJ Publishing Group Limited. [Mathijssen, E.G., van den Bemt, B.J., Wielsma, S., van den Hoogen, F.H. and Vriezekolk, J.E., 2020. Exploring healthcare professionals’ knowledge, attitudes and experiences of shared decision making in rheumatology. RMD open, 6(1), p.e001121].

Items 15-28 are adapted with permission from Simon, D., Kriston, L., Loh, A., Spies, C., Scheibler, F., Wills, C. and Härter, M., 2010. Confirmatory factor analysis and recommendations for improvement of the Autonomy‐Preference‐Index (API). Health expectations, 13(3), pp.234-243. © 2010 The Authors. Journal compilation © 2010 Blackwell Publishing Ltd

**Appendix B: The final version of the questionnaire items after face validity.**

| **Hello: You are invited to participate in our study titled " Shared Decision Making: Assessing Patients Awareness and Preferences in Saudi Arabia". It will take approximately 5-7 minutes to complete the questionnaire.**  **Your participation in this survey is completely voluntary. There are no foreseeable risks associated with this project. However, if you feel uncomfortable answering any questions, you can withdraw from the survey at any point. It is very important for us to learn your opinions. Your survey responses will be strictly confidential and data from this survey will be reported only in total.**  **Completing this questionnaire indicates that you declare that you are over the age of 18 and you agree to participate in the survey.**  **If you have questions at any time about the survey or the procedures, you may contact us at the email address (**[**2180005270@iau.edu.sa**](mailto:2180005270@iau.edu.sa)**)**  **Thank you very much for your time and support. Please start with the survey now by clicking on the "Continue" button below.** | مرحبا: أنت مدعو للمشاركة في دراسة بعنوان "صنع القرار المشترك: تقييم وعي المرضى وتفضيلاتهم في المملكة العربية السعودية". سيستغرق إكمال الاستبيان حوالي 5-7 دقائق.  مشاركتكم في هذا الاستبيان هي طوعية تماما. لا توجد مخاطر متوقعة مرتبطة بهذا المشروع. ومع ذلك، إذا كنت تشعر بعدم الارتياح للإجابة على أي أسئلة ، فبإمكانك الخروج من الاستبيان في أي وقت. من المهم جدًا بالنسبة لنا معرفة آرائك. ستكون إجاباتك على الاستبيان سرية للغاية وسيتم الاستفادة من هذا الاستبيان بشكل إجمالي فقط. يشير إكمال هذا الاستبيان إلى أن عمرك يتجاوز 18 عامًا وأنك توافق على المشاركة في البحث.  إذا كانت لديك أسئلة في أي وقت حول الاستبيان أو الإجراءات، يمكنك التواصل معنا عبر البريد الإلكتروني وهو  (**2180005270@iau.edu.sa**)  شكرا جزيلا على وقتك ودعمك. يرجى البدء بالاستبيان الآن بالضغط على الزر "متابعة" أدناه |
| --- | --- |
| **Demographic Information** | **معلومات شخصية** |
| **- Age:**  18-24  25-34  35-44  45-54  55-64  +64  **- Gender:**  Male  Female  **- What region do you live in?**  Eastern Region  Central Region  Southern Region  Northern Region  Western Region  **-Where do you live?**  Rural (Village) Area  Urban (City) Area  **-Nationality:**  Saudi  Non-Saudi  **-Do you have Health Insurance?**  Yes, Insured  No, Not Insured  **- Level of Education:**  Read and write  Elementary school  Intermediate school  High school  Diploma  Bachelor’s degree  Postgraduate degree  **-What is your Marital Status?**  Single  Married  Separated/ Divorced  Widowed  Prefer not to say  **-Do you have language barriers in communicating with your doctor?**  Always  Sometimes  Rarely  Never  **-Do you currently have a chronic disease(s)?**  I Do not have any chronic disease  One chronic disease  Two chronic diseases  More than two chronic diseases  **-What was the type of your last medical consultation with your doctor?**  Online  Face-to-face  - **What is the type of center/hospital where you usually got treatment during the past six months?**  Government Hospital  Private Hospital  Quasi-governmental Hospital (such as teaching hospital; military hospital)  Primary care center | **-العمر:**  18-24  25-34  35-44  45-54  55-64  +64  **- الجنس:**  ذكر  أنثى  **المنطقة التي تعيش فيها؟**  المنطقة الشرقية  المنطقة الوسطى  المنطقة الجنوبية  المنطقة الشمالية  المنطقة الغربية  **- أين تعيش؟**  المنطقة الريفية (القرية)  المنطقة الحضرية (المدينة)  **- الجنسية:**  سعودي  غير سعودي  **- هل لديك تأمين صحي؟**  نعم، لدي تأمين طبي  لا، ليس لدي تأمين طبي  **- المستوى التعليمي:**  قراءة وكتابة  شهادة ابتدائية  شهادة متوسطة  شهادة ثانوية  دبلوم  درجة بكالوريوس  دراسات عليا  **- ما هو وضعك الاجتماعي؟**  أعزب / عزباء  متزوج /ة  منفصل/ة أو مطلق/ة  أرمل/ة  أفضل عدم الافصاح  **- هل لديك عائق لغوي في التواصل مع الدكتور الخاص بك؟**  دائما  بعض الأحيان  نادرا  ابدا  **- هل تعاني حاليًا من مرض (أمراض) مزمن/ة؟**  ليس لدي أي مرض مزمن  مرض مزمن واحد  مرضان مزمنان  أكثر من مرضين مزمنين  **- ما هو نوع استشارتك الطبية الأخيرة مع الدكتور الخاص بك؟**  عبر الانترنت  وجها لوجه  **-ما هو نوع المركز / المستشفى الذي عادة ما تتلقى فيه العلاج خلال الأشهر الستة الماضية؟**  مستشفى حكومي  مستشفى خاص  مستشفى شبه حكومي (مثلا مستشفى تعليمي ، عسكري.. الخ)  مركز الرعاية الأولية |
| **Awareness of Shared Decision-Making process:** | **الوعي بعملية صنع القرار المشترك:** |
| **1- How much do you know about shared decision making with your doctor**? Please score your knowledge on a scale from 0 (=no knowledge) to 10 (=comprehensive knowledge). | ١- **ما مقدار معرفتك عن مفهوم المشاركة في صنع القرار مع الطبيب المعالج؟** يرجى تسجيل معرفتك باستخدام مقياس من ٠ (= ليس لدي ) إلى ١٠ (= معرفة شاملة). |
| Awareness of Shared Decision-Making: In your opinion, to what extent do you think the following communicative behaviors are essential for shared decision-making? (1- not essential at all, 2-moderately (not essential), 3-neutral, 4-essential, 5-highly essential).  2- The doctor should explain to me that there is more than one treatment option available. | الوعي بصنع القرار المشترك: في رأيك، إلى أي مدى تعتقد أن سلوكيات التواصل التالية ضرورية لصنع القرار المشترك بينك وبين الطبيب المعالج؟ (١- ليس ضروريًا على الإطلاق، ٢ – معتدل (غير أساسي) ، ٣- محايد ، ٤- أساسي ، ٥- ضروري للغاية)  ٢ - على الطبيب أن يشرح لي أن هناك أكثر من خيار علاجي متاح. |
| 3- The doctor should inform me about the possible pros and cons of the treatment options. | ٣ يجب أن يخبرني الطبيب عن إيجابيات وسلبيات خيارات العلاج الممكنة. |
| 4- The doctor should inform me how big the chances of success of the treatment in terms of pros and cons. | ٤- يجب أن يخبرني الطبيب عن حجم فرص نجاح العلاج من حيث الإيجابيات والسلبيات. |
| 5- The doctor should explain to me the reason for choosing a certain treatment. | ٥- على الطبيب أن يشرح لي سبب اختيار علاج معين. |
| 6- The doctor and I should agree on a treatment decision together. | ٦- يجب أن نتخذ أنا والطبيب قرار العلاج معًا. |
| 7- The doctor should explain to me that my opinion is important in making the decision. | ٧- على الطبيب أن يشرح لي أن رأيي مهم في اتخاذ القرار. |
| 8- The doctor should discuss with me my personal values, needs and preferences as they relate to the treatment options. | ٨- يجب أن يسألني الطبيب عما افضّله في خطة العلاج بناء على قيمي، احتياجاتي، واختياراتي الشخصية. |
| 9- The doctor should give me the information in other ways than verbally (e.g., leaflets, websites). | 9- يجب أن يعطيني الطبيب المعلومات بطرق أخرى غير الطريقة شفهية (مثل المنشورات والمواقع الإلكترونية). |
| 10- The doctor should let me decide after giving thorough information about my health condition. | ١٠- يجب أن يسمح لي الطبيب باتخاذ القرار بعد تقديم معلومات وافية عن حالتي الصحية. |
| 11- The doctor should ask me to repeat the information to ensure full understanding of the treatment option(s) available. | 11- يجب على الطبيب أن يطلب مني إعادة شرح المعلومات المقدمة لي للتأكد من فهمي الكامل لخيارات العلاج المتاحة. |
| 12- The doctor should allow me to be accompanied by a family member to assist me in the decision-making process. | 12- يجب أن يسمح لي الطبيب بالحضور مع أحد أفراد الأسرة لمساعدتي في عملية اتخاذ القرار. |
| 13- I should be given enough time to make a decision regarding my health condition. | ١٣- على الطبيب أن يمنحني الوقت الكافي لاتخاذ القرار الذي يخص حالتي الصحية. |
| **Your Preferences of Shared Decision-Making:** | **رغبتك بالمشاركة في عملية صنع القرار:** |
| Thinking about your preferences during the consultations with your doctor in the last Six months, to what extent do you agree or disagrees about the following (1 strongly disagree- 5 strongly agrees):  1- The important medical decisions should be made by my doctor, not by me. | بالتفكير في زياراتك للطبيب خلال الستة أشهر الماضية، إلى أي مدى توافق أو لا توافق على ما يلي (١.لاأوافق بشدة -- ٥. أوافق بشدة):  ١. القرارات الطبية الهامة يجب أن يتخذها الطبيب وليس أنا. |
| 2- I should go along with my doctor’s advice even if I disagree with it. | 2- يجب أن أتماشى مع نصيحة الطبيب، حتى لو كنت لا أوافق عليها. |
| 3. When hospitalized, I should not be involved in making decisions about my own care. | 3- اذا كانت حالتي الصحية تستدعي التنويم بالمستشفى ، لا ينبغي أن أشارك في اتخاذ القرارات المتعلقة بحالتي الصحية |
| 4- I should feel free to make decisions about my everyday medical condition. | 4- يجب ان أشعر بالحرية في اتخاذ القرارات بشأن حالتي الصحية اليومية. |
| 5- If I were sick, as my illness became worse, I would prefer my doctor to take greater control over my medical plan. | 5. إذا كنتُ مريضًا، وأصبح مرضي أسوأ، أفضل أن يتحكم الطبيب بشكل أكبر حول خطة علاجي |
| 6- I should decide how frequently I need a check-up. | 6- يجب أن أقرر عدد المرات التي أحتاج فيها لإجراء فحص طبي |
| 7- If I were sick, I prefer to be told about my illness in detail. | 7- عندما أصبح مريضًا، يجب أن يتم إخباري عن مرضي بالتفصيل |
| 8- I should completely understand what is happening inside my body as a result of my illness. | 8- يجب أن أفهم تمامًا ما يحدث داخل جسدي نتيجة لمرضي |
| 9- I should be well informed about my illness and health condition, no matter how bad the news is. | 9- لو كانت الأخبار سيئة عن مرضي ، يجب أن أكون على اطلاع جيد بها. |
| 10- My doctor should explain to me the purpose of any ordered laboratory tests (e.g., x-ray). | 10- يجب أن يشرح الطبيب الغرض من الاختبارات التشخيصية المطلوبة لي (مثلاً فحوصات مخبرية، طلب أشعة) |
| 11- I should be given information only when I ask for it. | 11- يجب أن أحصل على المعلومات فقط عندما أطلبها |
| 12- It is important for me to know all the side effects of my medication. | 12- من المهم أن أعرف جميع الآثار الجانبية لدوائي |
| 13- Information about my illness is as important to me as my treatment. | 13- المعلومات حول مرضي مهمة بالنسبة لي مثل أهمية المعلومات حول علاجي |
